# Supplementary material
Source: Springer Nature journal article supplement (https://www.springermedizin.de/resource/supplementary/13550_2012_146_MOESM9_ESM.pdf/9687644)

A

B

C

H3

P3

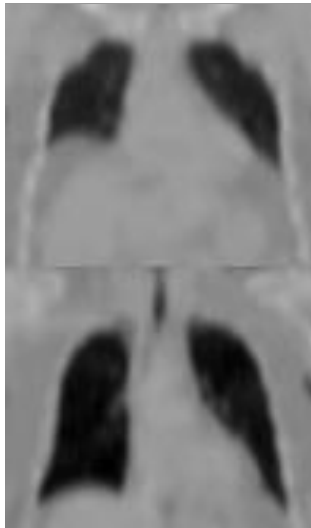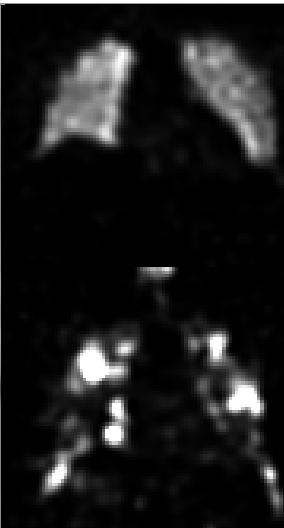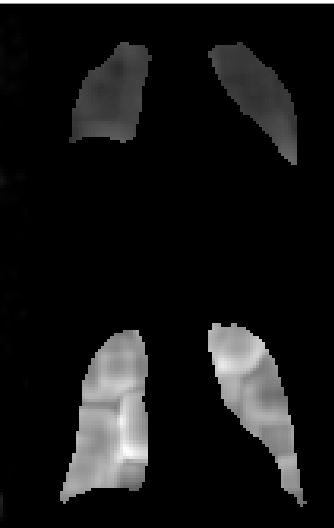

0%

180%

Supplement: MOESM9 [file 9687644]
